# Supplementary material for: The EF-hand calcium-binding protein tescalcin is a potential oncotarget in colorectal cancer
Source: PubMed Central journal article supplement (PMC4039152; doi:10.18632/oncotarget.1851), 2014-03-19
Supplement: oncotarget-05-2149-s001.pdf [file oncotarget-05-2149-s001.pdf]

**The EF-hand calcium-binding protein tescalcin is a potential oncotarget  
in colorectal cancer** - Kang *et al* -

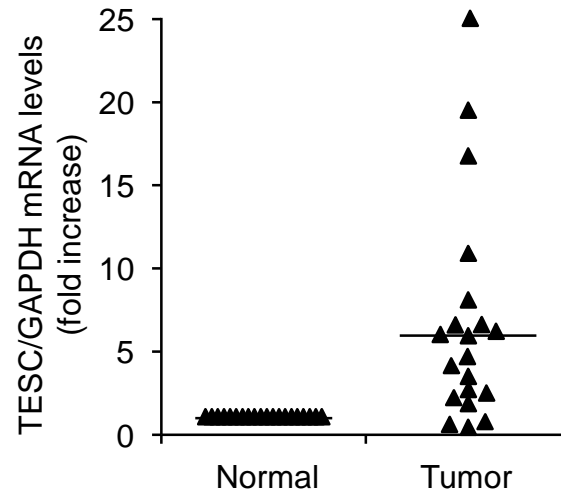

**Supplementary Figure 1:** TESC mRNA and protein expression in human colorectal tissues was analyzed by real time RT-PCR and western blot analysis respectively. The expression level of TESC in each sample was determined as the ratio of TESC to GAPDH. The expression of tumor TESC was given as a relative value compared with TESC/GAPDH of matched normal controls (n=20; taken as 1.0).

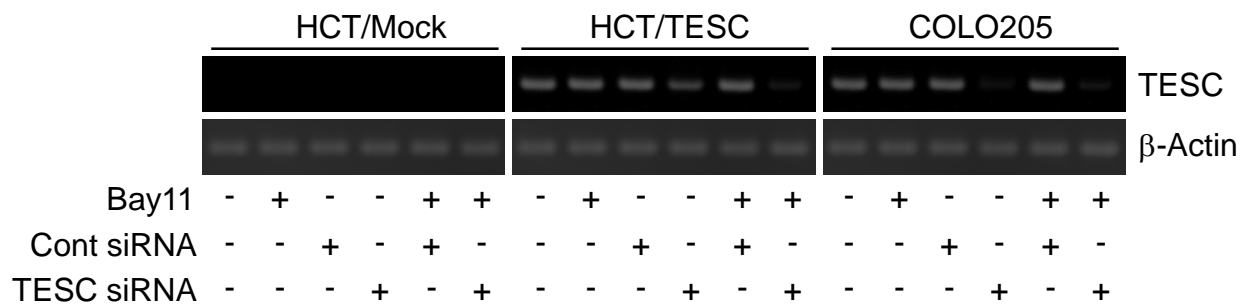

**Supplementary Figure 2:** Effect of combination treatment with NF- $\kappa$ B inhibitor and TESC siRNA on TESC expression of human colorectal cancer cells HCT/Mock, HCT/TESC, and COLO205. Cells were treated with the NF- $\kappa$ B inhibitor Bay 11-7082 (10  $\mu$ M) under the transfection with TESC siRNA. The transcriptional expression of TESC was measured by RT-PCR analysis.  $\beta$ -Actin was used as the loading control. Data are representative of two experiments.

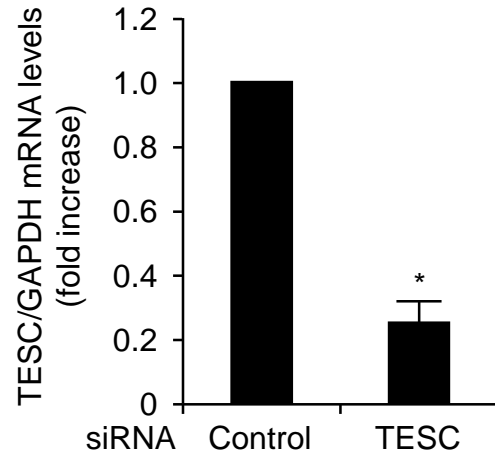

**Supplementary Figure 3** - Real-time RT-PCR analysis of TESC expression in xenograft tumors formed by COLO205 cells expressing control shRNA or TESC shRNA. The level of expression of TESC in each sample was determined as the ratio of TESC to GAPDH. The expression of TESC in TESC shRNA-expressing xenograft tumor was calculated as a relative value of TESC/GAPDH compared with TESC/GAPDH of control shRNA-xenograft tumor (taken as 1.0). \* $P < 0.05$ . Data are representative of two experiments.

## Supplementary Table 1.

### Differentially expressed genes between tumor and non-tumor tissues of patients with colorectal cancer

| Gene Symbol | Gene Title                                                             | Regulation (tumor vs normal) | Fold change- average | Patient's number of 2-fold change |
|-------------|------------------------------------------------------------------------|------------------------------|----------------------|-----------------------------------|
| COL7A1      | collagen, type VII, alpha 1                                            | up                           | 2.007                | 58                                |
| SNTB1       | syntrophin, beta 1 (dystrophin-associated protein A1, 59kDa, basic con | up                           | 1.288                | 50                                |
| UTP11L      | UTP11-like, U3 small nucleolar ribonucleoprotein                       | up                           | 1.258                | 51                                |
| PI3         | peptidase inhibitor 3, skin-derived                                    | up                           | 1.153                | 51                                |
| IL1B        | interleukin 1, beta                                                    | up                           | 1.9                  | 55                                |
| MMP12       | matrix metalloproteinase 12                                            | up                           | 1.743                | 53                                |
| SULT2B1     | sulfotransferase family, cytosolic, 2B, member 1                       | up                           | 1.691                | 59                                |
| SLCO4A1     | solute carrier organic anion transporter family, member 4A1            | up                           | 2.89                 | 63                                |
| TESC        | tescalcin                                                              | up                           | 2.41                 | 57                                |
| KPNA2       | karyopherin alpha 2 (RAG cohort 1, importin alpha 1)                   | up                           | 2.27                 | 66                                |
| MTHFD1L     | methylenetetrahydrofolate dehydrogenase (NADP+ dependent) 1-like       | up                           | 2.19                 | 66                                |
| UBE2C       | ubiquitin-conjugating enzyme E2C                                       | up                           | 2.17                 | 63                                |
| SRPX2       | sushi-repeat containing protein, X-linked 2                            | up                           | 2.16                 | 50                                |
| NKD2        | naked cuticle homolog 2                                                | up                           | 2.15                 | 55                                |
| NFE2L3      | nuclear factor, erythroid 2-like 3                                     | up                           | 2.291                | 65                                |
| ESM1        | endothelial cell-specific molecule 1                                   | up                           | 5.7                  | 65                                |
| MMP1        | matrix metalloproteinase 1 (interstitial collagenase)                  | up                           | 3.11                 | 50                                |
| AZGP1       | alpha-2-glycoprotein 1, zinc-binding                                   | up                           | 3                    | 51                                |
| EGFL6       | EGF-like-domain, multiple 6                                            | up                           | 2.97                 | 51                                |
| COL11A1     | collagen, type XI, alpha 1                                             | up                           | 2.9                  | 55                                |
| CXCL6       | chemokine (C-X-C motif) ligand 6                                       | up                           | 2.67                 | 53                                |
| COL1A1      | collagen, type I, alpha 1                                              | up                           | 2.4                  | 45                                |
| AGT         | angiotensinogen (serpin peptidase inhibitor, clade A, member 8)        | up                           | 2.38                 | 44                                |
| TCN1        | transcobalamin I (vitamin B12 binding protein, R binder family)        | up                           | 3.46                 | 46                                |
| CEL         | carboxyl ester lipase                                                  | up                           | 3.35                 | 48                                |
| GDF15       | growth differentiation factor 15                                       | up                           | 2.87                 | 40                                |
| ALDOB       | aldolase B, fructose-bisphosphate                                      | up                           | 2.53                 | 42                                |

## Supplementary Table 2.

### Expression of TESC in CRC tissues by real-time RT-PCR

|                     | N  | Mean±SD     | <i>p</i> value |
|---------------------|----|-------------|----------------|
| Tumor size (cm)     |    |             |                |
| <5 cm in diameter   | 2  | 2.48±3.09   | 0.26           |
| ≥5 cm in diameter   | 8  | 12.35±20.15 |                |
| Not defined         | 10 |             |                |
| Differentiation     |    |             |                |
| Well                | 3  | 94.31±85.45 | 0.008          |
| Moderately          | 15 | 11.46±18.25 |                |
| Not defined         | 2  |             |                |
| Invasion Depth      |    |             |                |
| T2                  | 2  | 9.91±13.45  | 0.25           |
| T3                  | 15 | 27.19±48.80 |                |
| T4                  | 1  | 6.59        |                |
| Not defined         | 2  |             |                |
| Nodal status        |    |             |                |
| N0                  | 11 | 35.2±55.58  |                |
| Not defined         | 9  |             |                |
| Distance metastasis |    |             |                |
| M0                  | 9  | 5.00±5.81   | 0.04           |
| M1                  | 4  | 34.19±38.70 |                |
| Not defined         | 7  |             |                |
